# Supplementary material
Source: publisher site journal article supplement (https://www.spandidos-publications.com/4585/downloadSupplementary)
Supplement: Supplementary file 1 [file downloadSupplementary]

Table SI. Semi-quantification of expression levels of proteins involved in apoptosis, as shown in the western blotting in Fig. 3B.

| Protein     |     | Control | TRAIL | Phloretin | TRAIL + phloretin |
|-------------|-----|---------|-------|-----------|-------------------|
| c-PARP      | 1st | 0.028   | 0.090 | 0.043     | 0.525             |
|             | 2nd | 0.081   | 0.251 | 0.122     | 1.619             |
|             | 3rd | 0.057   | 0.170 | 0.084     | 1.076             |
| c-caspase 3 | 1st | 0.071   | 0.061 | 0.049     | 0.523             |
|             | 2nd | 0.064   | 0.047 | 0.067     | 0.725             |
|             | 3rd | 0.203   | 0.131 | 0.196     | 2.253             |
| c-caspase 8 | 1st | 0.198   | 0.461 | 0.233     | 0.723             |
|             | 2nd | 0.631   | 1.293 | 0.680     | 2.247             |
|             | 3rd | 0.196   | 0.315 | 0.340     | 1.706             |
| c-caspase 9 | 1st | 0.145   | 0.097 | 0.202     | 0.844             |
|             | 2nd | 0.461   | 0.273 | 0.591     | 2.623             |
|             | 3rd | 0.174   | 0.150 | 0.314     | 1.632             |

c-, cleaved; PARP, poly (ADP-ribose) polymerase; TRAIL, tumor necrosis factor-related apoptosis-inducing ligand.

Table SII. Semi-quantification of expression levels of proteins involved in the apoptosis signaling pathway, as shown in the western blotting in Fig. 3C.

| Protein  | Control | Phloretin |       |       | P-value         |
|----------|---------|-----------|-------|-------|-----------------|
|          | 1st-3rd | 1st       | 2nd   | 3rd   |                 |
| DR4      | 1       | 1.276     | 1.279 | 1.272 | 0.0000000178625 |
| DR5      | 1       | 1.068     | 1.129 | 1.101 | 0.004690763     |
| Bax      | 1       | 0.702     | 0.721 | 0.723 | 0.00000178015   |
| Bim      | 1       | 1.155     | 1.157 | 0.940 | 0.306464462     |
| Puma     | 1       | 0.746     | 0.748 | 1.026 | 0.16039682      |
| Bid      | 1       | 0.762     | 0.764 | 0.839 | 0.00112634      |
| Bcl-xL   | 1       | 1.165     | 1.168 | 1.378 | 0.028195579     |
| Bcl-2    | 1       | 1.491     | 1.494 | 0.768 | 0.357105933     |
| Mcl-1    | 1       | 0.427     | 0.428 | 0.580 | 0.000510264     |
| XIAP     | 1       | 0.930     | 0.933 | 0.847 | 0.026301825     |
| Survivin | 1       | 0.825     | 0.827 | 0.957 | 0.040818333     |

Bid, BH3 interacting domain death agonist; Bim, Bcl-2-like protein 11; DR, death receptor; Mcl-1, MCL1 apoptosis regulator BCL2 family member; Puma, p53-upregulated modulator of apoptosis; XIAP, X-linked inhibitor of apoptosis protein.

Table SIII. Semi-quantification of MCL1 apoptosis regulator BCL2 family member expression in DLD-1 and SUN283 cells treated with phloretin, as shown in the western blotting in Fig. 3D.

| Cell line |     | Control | Phloretin |
|-----------|-----|---------|-----------|
| DLD-1     | 1st | 1       | 0.179     |
|           | 2nd | 1       | 0.179     |
|           | 3rd | 1       | 0.092     |
| SNU283    | 1st | 1       | 0.515     |
|           | 2nd | 1       | 0.441     |
|           | 3rd | 1       | 0.532     |

Table SIV. Semi-quantification of MCL1 apoptosis regulator BCL2 family member expression in HT-29-Luc cells after treatment with phloretin and MG132, as shown in the western blotting in Fig. 4C.

|     | Control | Phloretin | MG132 | MG132 + phloretin |
|-----|---------|-----------|-------|-------------------|
| 1st | 1       | 0.143     | 2.122 | 2.295             |
| 2nd | 1       | 0.151     | 2.117 | 2.210             |
| 3rd | 1       | 0.021     | 2.385 | 2.566             |

Table SV. Semi-quantification of MCL1 apoptosis regulator BCL2 family member in lysates after immunoprecipitation with ubiquitin, as shown in the western blotting in Fig. 4D.

|           | 1st   | 2nd   | 3rd   |
|-----------|-------|-------|-------|
| IgG       | 1     | 1     | 1     |
| Control   | 1.010 | 0.949 | 1.008 |
| Phloretin | 0.014 | 0.021 | 0.014 |

Table SVI. Percentage of tumor weight compared with mouse weight.

|   | Control, % | TRAIL, % | Phloretin, % | TRAIL + phloretin, % |
|---|------------|----------|--------------|----------------------|
| 1 | 5.6        | 2.9      | 5.4          | 2.2                  |
| 2 | 4.2        | 5.1      | 6.4          | 2.5                  |
| 3 | 3.9        | 7.2      | 3.4          | 4.5                  |
| 4 | 3.3        | 2.6      | 3.1          | 4.6                  |
| 5 | 10.3       | 6.1      | 3.9          |                      |

TRAIL, tumor necrosis factor-related apoptosis-inducing ligand.
